# Supplementary material for: Improvement of patient satisfaction with the neurosurgery service at a large tertiary care, London-based hospital
Source: PubMed Central journal article supplement — BMJ Qual Improv Rep. 2014 Jun 3;3(1):u203956.w1881. doi: 10.1136/bmjquality.u203956.w1881 (PMC4645699; doi:10.1136/bmjquality.u203956.w1881), 2014-06-03
Supplement: bmjqir-3-u203956-w1881-s2.pdf [file bmjqir-3-u203956-w1881-s2.pdf]

**Graph 1: Representation of improvement of number of patients pre and post-intervention**

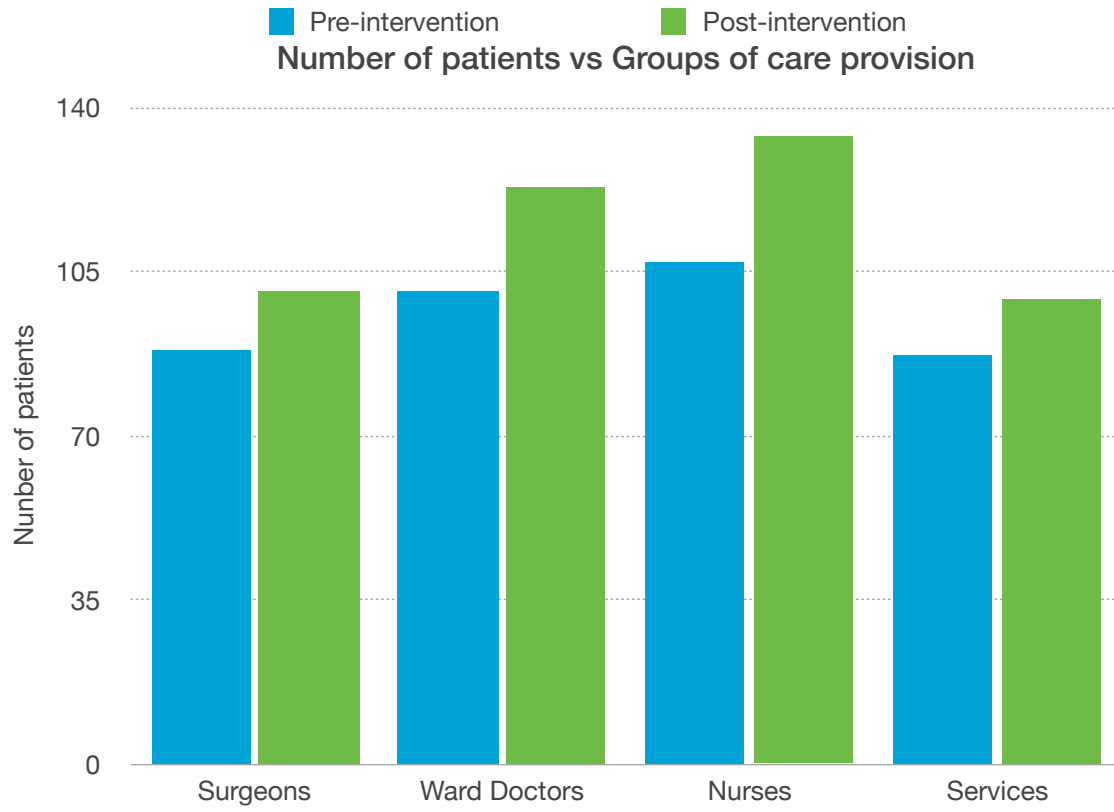

**Table 1. Strengths and areas needing improvement**

|                      | <b>Strengths</b>                                                        | <b>Weaknesses</b>                                                                                                              |
|----------------------|-------------------------------------------------------------------------|--------------------------------------------------------------------------------------------------------------------------------|
| <b>Neurosurgeons</b> | Good explanation of reasons for patients' treatment.                    | More patient involvement in discussions of treatment.                                                                          |
|                      | Overwhelming majority satisfied with results of their operation.        | More attention and time give to listen to what patients have to say.                                                           |
|                      | Great confidence of patients in being under the neurosurgeons care.     |                                                                                                                                |
| <b>Ward Doctors</b>  | Good attitude towards patients.                                         | Need to give more understandable explanations to questions that patients have.                                                 |
|                      | Patients are confident in being under their care.                       | Need to give more attention to the patients.                                                                                   |
|                      |                                                                         | Improve communication with doctors from other services involved in patients' care.                                             |
| <b>Nurses</b>        | Pleasant and professional attitude.                                     | Prevent misinformation from being given to patients with regards to their illness and their future course of stay in the ward. |
|                      | Give enough attention to patients.                                      |                                                                                                                                |
|                      | Listen to patients attentively.                                         |                                                                                                                                |
| <b>Services</b>      | Transportation facilities, both internal and external.                  | Better quality food.                                                                                                           |
|                      | Cleanliness.                                                            | Need more interpreters.                                                                                                        |
|                      | Adequate facilities provided for those with disabilities/special needs. | Increase number of HDU beds                                                                                                    |
